# Supplementary material for: Poly(3-hexylthiophene)-block-poly(5,8-di-p-tolylquinoxaline-2,3-diyl) conjugated rod–rod copolymers: one pot synthesis, self-assembly and highly selective sensing of cobalt
Source: Royal Society of Chemistry journal article supplement (doi:10.1039/c4ra06571a), 2014-08-15
Supplement: c4ra06571a1.pdf [file c4ra06571a1.pdf]

Electronic Supplementary Material (ESI)

## **Poly(3-hexylthiophene)-*block*-Poly(5,8-di-p-tolylquinoxaline-2,3-diyl) Conjugated Rod-Rod Copolymers: One Pot Synthesis, Self-Assembly and Highly Selective Sensing for Cobalt**

**Yuan-Yuan Zhu, Ting-Ting Yin, Ji Yin, Na Liu, Zhi-Peng Yu, Yan-Wu Zhu, Yun-Sheng Ding, Jun Yin,\*  
and Zong-Quan Wu\***

*Key Laboratory of Advanced Functional Materials and Devices, Anhui Province, Department of Polymer Material and Engineering, School of Chemistry and Chemical Engineering, Hefei University of Technology, Hefei 230009, China.*

\*Corresponding Author: [yinjun@hfut.edu.cn](mailto:yinjun@hfut.edu.cn), [zqwu@hfut.edu.cn](mailto:zqwu@hfut.edu.cn).

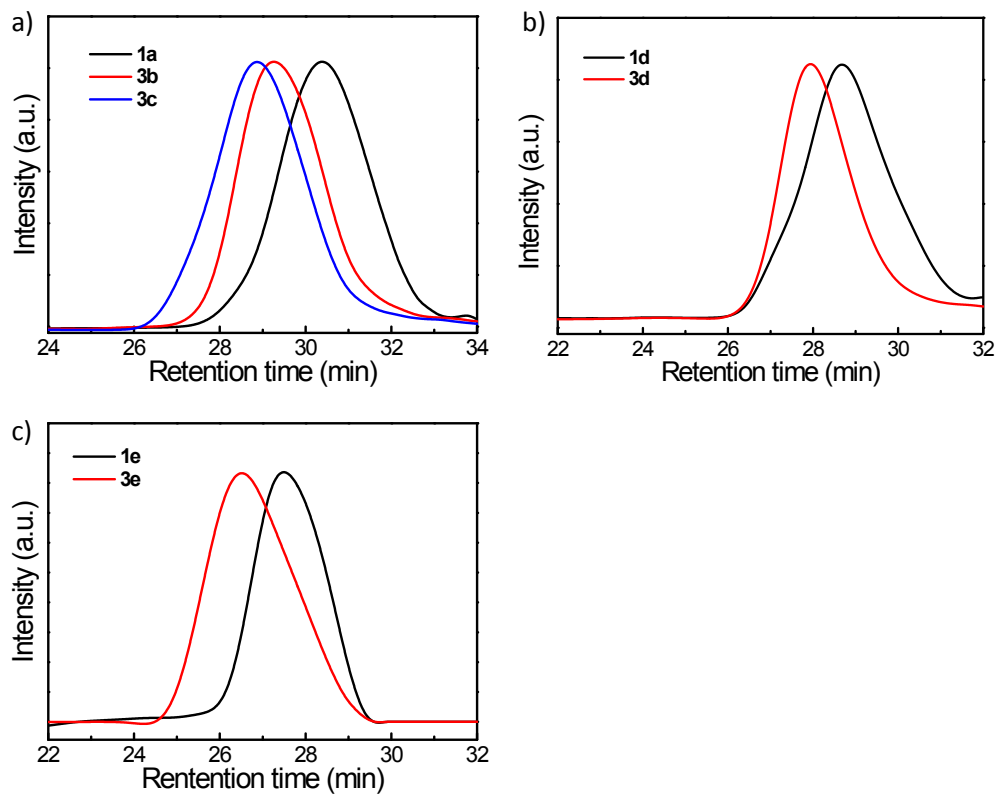

**Fig. S1.** Size exclusion chromatograms of P3HTmacroinitiators (**1**) and their respective P3HT-*b*-PDQ block copolymers (**3**). SEC conditions: eluent = THF; temperature = 40 °C.

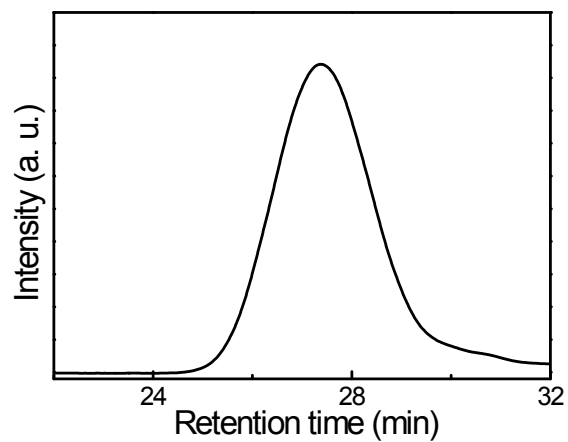

**Fig. S2.** Size exclusion chromatogram of PDQ homopolymer. SEC conditions: eluent = THF; temperature = 40 °C.

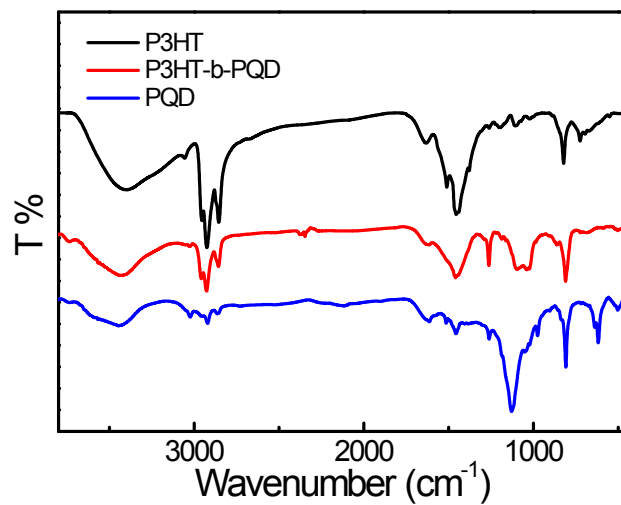

**Fig. S3.** FT-IR spectra of P3HT (**1a**), PDQ, and P3HT-*b*-PDQ block copolymer (**3a**) at 25 °C using KBr pellets.

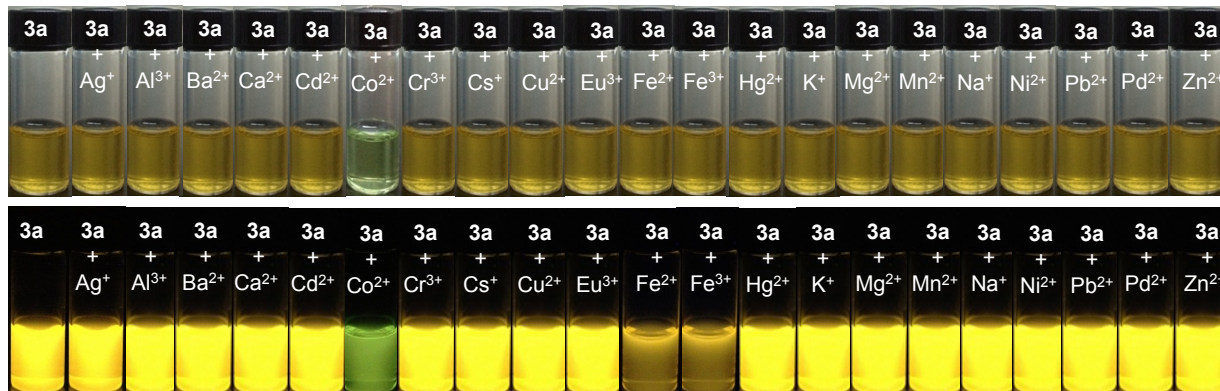

**Fig. S4.** Photographs of P3HT-*b*-PDQ block copolymer **3a** in THF (0.025 mg/mL) upon addition of aqueous solutions various metals ions ( $2.0 \times 10^{-6}$  M) under room light (top) and irradiation at 365 nm (bottom) at 25 °C.

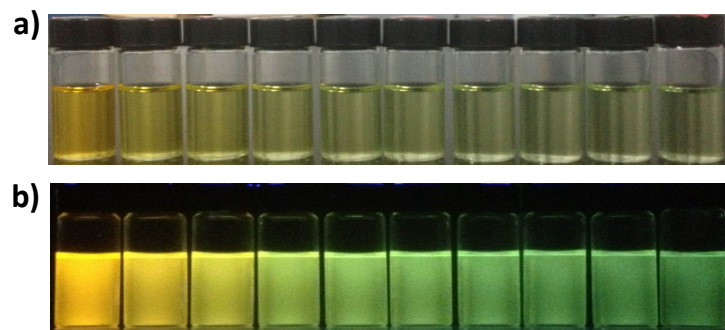

**Fig. S5.** Color (a) and emission (b) changes of P3HT-*b*-PDQ block copolymer **3a** in THF (0.025 mg/mL) upon addition of various amount of  $\text{Co}^{2+}$  in  $\text{H}_2\text{O}$  at 25 °C (concentration of  $\text{Co}^{2+}$ : from 0 to  $2.0 \times 10^{-6}$  M,  $\lambda_{\text{ex}} = 365$  nm).

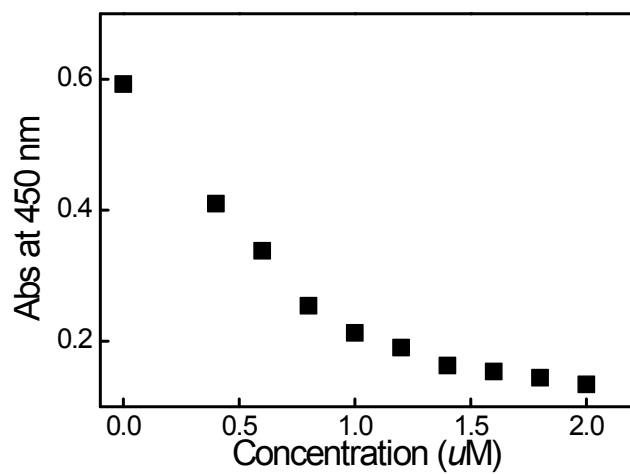

**Fig. S6.** Absorption changes (450 nm) of P3HT-*b*-PDQ block copolymer **3a** in THF (0.025 mg/mL) upon addition of various amount of Co<sup>2+</sup> in H<sub>2</sub>O at 25 °C (concentration of Co<sup>2+</sup>: from 0 to 2.0 × 10<sup>-6</sup> M).

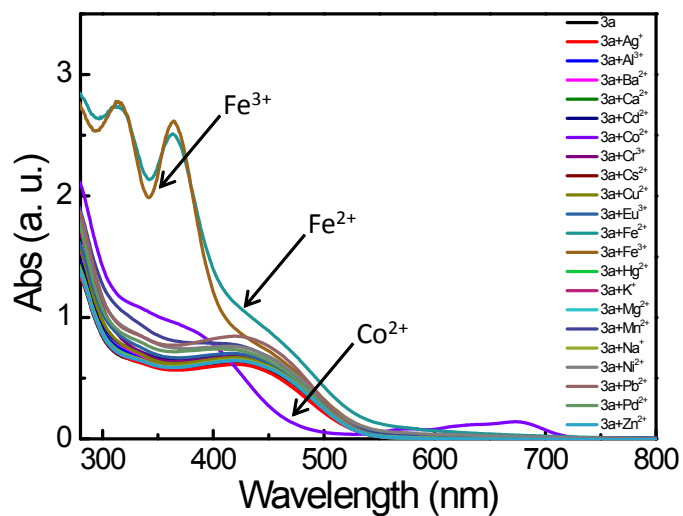

**Fig. S7.** UV-vis absorption spectra of P3HT-*b*-PDQ block copolymer **3a** (0.025 mg/mL) in THF upon addition of various metal ions in H<sub>2</sub>O ( $2.0 \times 10^{-6}$  M) at 25 °C.



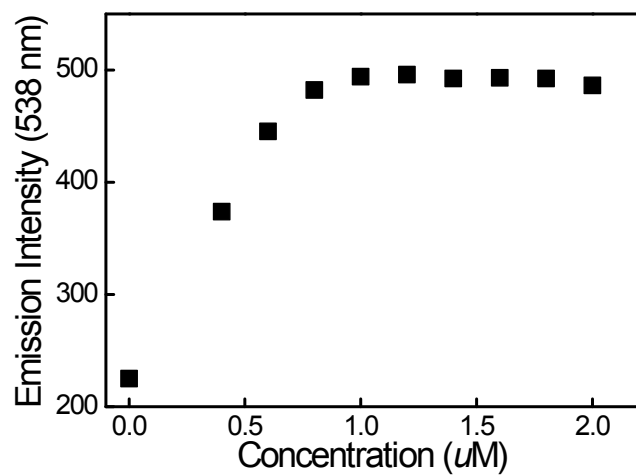

**Fig. S8.** Changes of fluorescent intensity (538 nm) of P3HT-*b*-PDQ block copolymer **3a** in THF (0.025 mg/mL) upon addition of various amount of Co<sup>2+</sup> in H<sub>2</sub>O at 25°C (concentration of Co<sup>2+</sup>: from 0 to 2.0 × 10<sup>-6</sup> M).

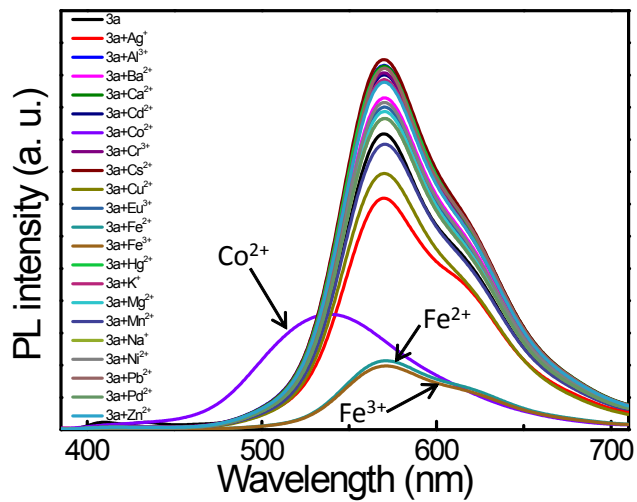

**Fig. S9.** Fluorescent spectra of P3HT-*b*-PDQ block copolymer **3a** (0.025 mg/mL) in THF upon addition of various metal ions in H<sub>2</sub>O ( $2.0 \times 10^{-6}$  M) at 25 °C.

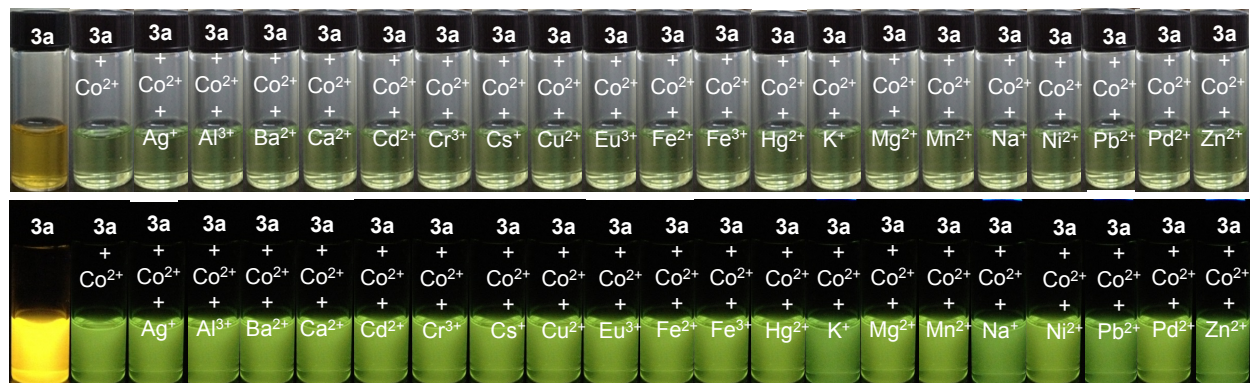

**Fig. S10.** Photographs of P3HT-*b*-PDQ block copolymer **3a** (0.025 mg/mL) and **3a** (0.025 mg/mL) containing  $\text{Co}^{2+}$  ( $1.6 \times 10^{-6}$  M) in THF and in presence of aqueous solutions of various metal ions ( $6.0 \times 10^{-6}$  M) under room light (top) and irradiation at 365 nm (bottom) at 25 °C.

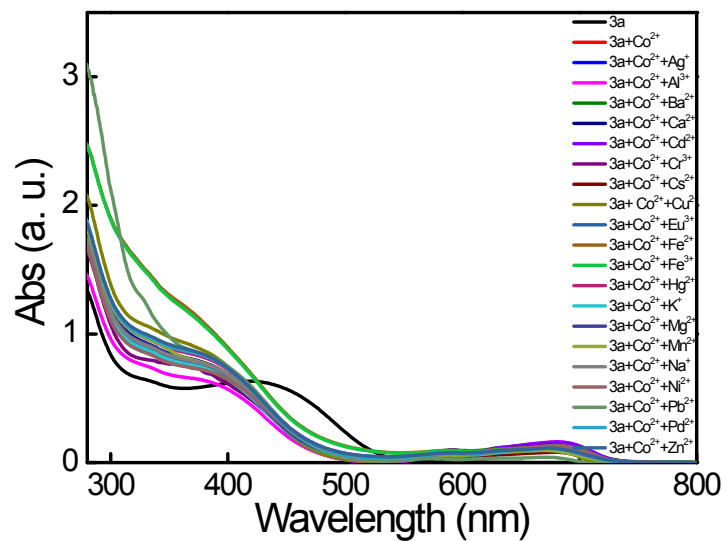

**Fig. S11.** Absorption spectra of P3HT-*b*-PDQ block copolymer **3a** (0.025 mg/mL) containing  $\text{Co}^{2+}$  ( $1.6 \times 10^{-6}$  M) in THF upon addition of various metal ions in  $\text{H}_2\text{O}$  ( $6.0 \times 10^{-6}$  M) at 25 °C.

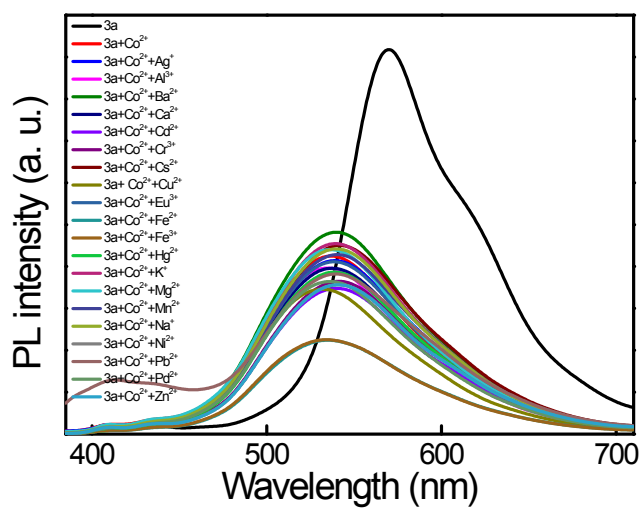

**Fig. S12.** Fluorescent spectra of P3HT-*b*-PDQ block copolymer **3a** (0.025 mg/mL) containing Co<sup>2+</sup> ( $1.6 \times 10^{-6}$  M) in THF upon addition of aqueous solutions of various metal ions ( $6.0 \times 10^{-6}$  M) at 25 °C.

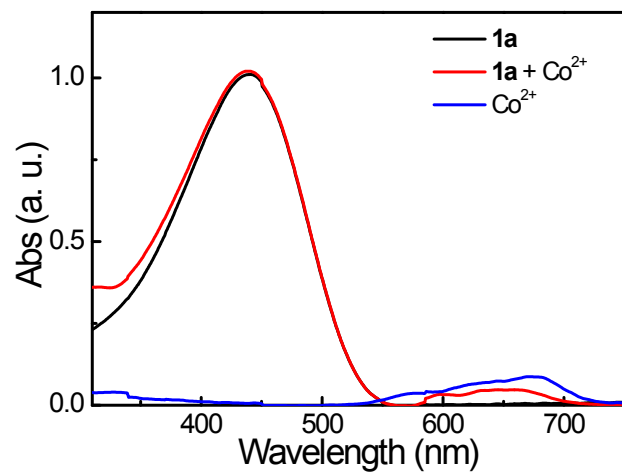

**Fig. S13.** Normalized absorption spectra of P3HT (**1a** in THF), Co<sup>2+</sup> (in H<sub>2</sub>O), and the mixture of **1a** (in THF) and Co<sup>2+</sup> (in H<sub>2</sub>O) measured at 25 °C.

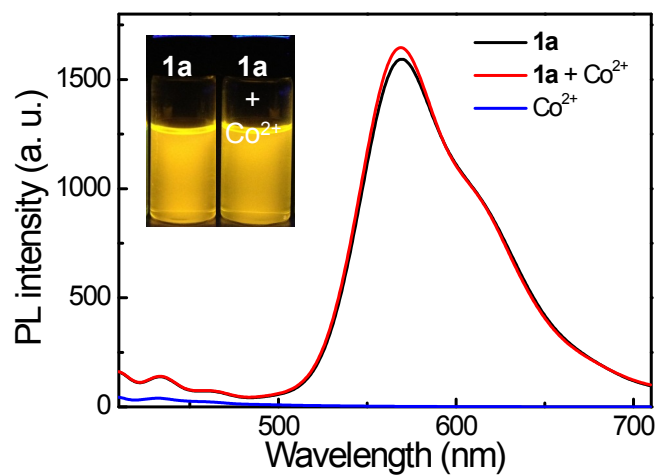

**Fig. S14.** Fluorescent spectra of homopolymer P3HT (**1a**, in THF), Co<sup>2+</sup> (in H<sub>2</sub>O) and the mixture of **1a** (in THF) and Co<sup>2+</sup> (in H<sub>2</sub>O) measured in THF at 25 °C.

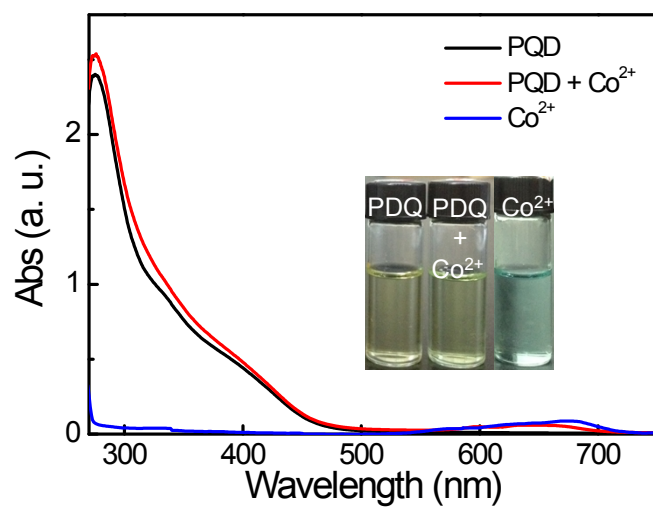

**Fig. S15.** Normalized absorption spectra of PDQ,  $\text{Co}^{2+}$  and the mixture of PDQ (in THF) and  $\text{Co}^{2+}$  (in  $\text{H}_2\text{O}$ ) measured at 25 °C.



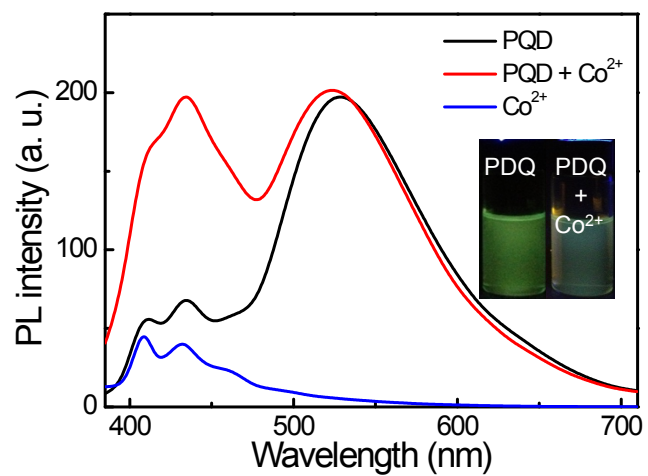

**Fig. S16.** Fluorescent spectra of homopolymer PDQ in THF, Co<sup>2+</sup> in H<sub>2</sub>O, and the mixture of PDQ (in THF) with Co<sup>2+</sup> (in H<sub>2</sub>O) measured at 25 °C.

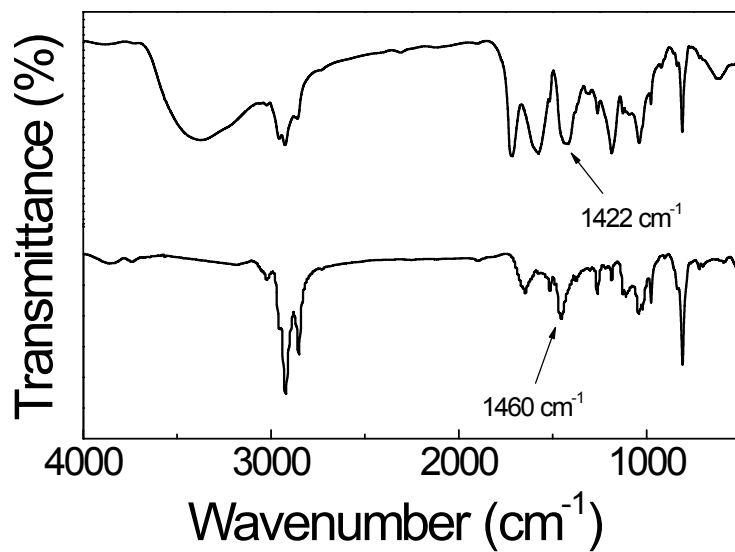

**Fig. S17.** IR spectra obtained for P3HT-*b*-PDQ block copolymer **3a** (down) before and (top) after addition of Co<sup>2+</sup>.

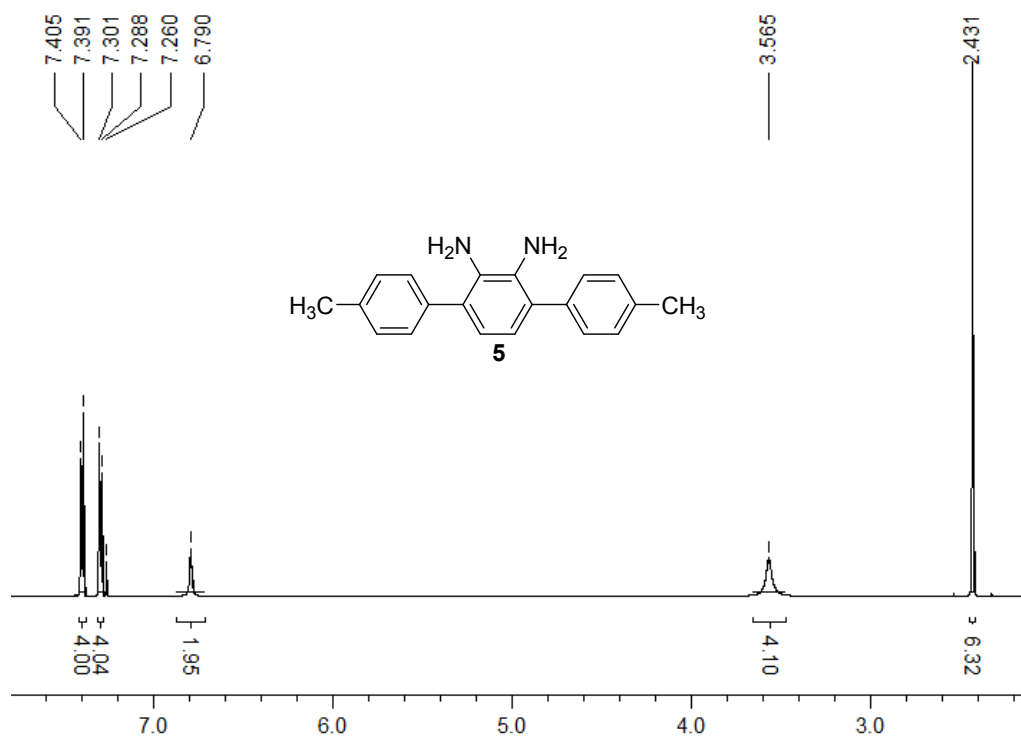

**Fig. S18.** <sup>1</sup>H NMR (600 MHz) spectrum of compound **5** measured in CDCl<sub>3</sub> at 25 °C.

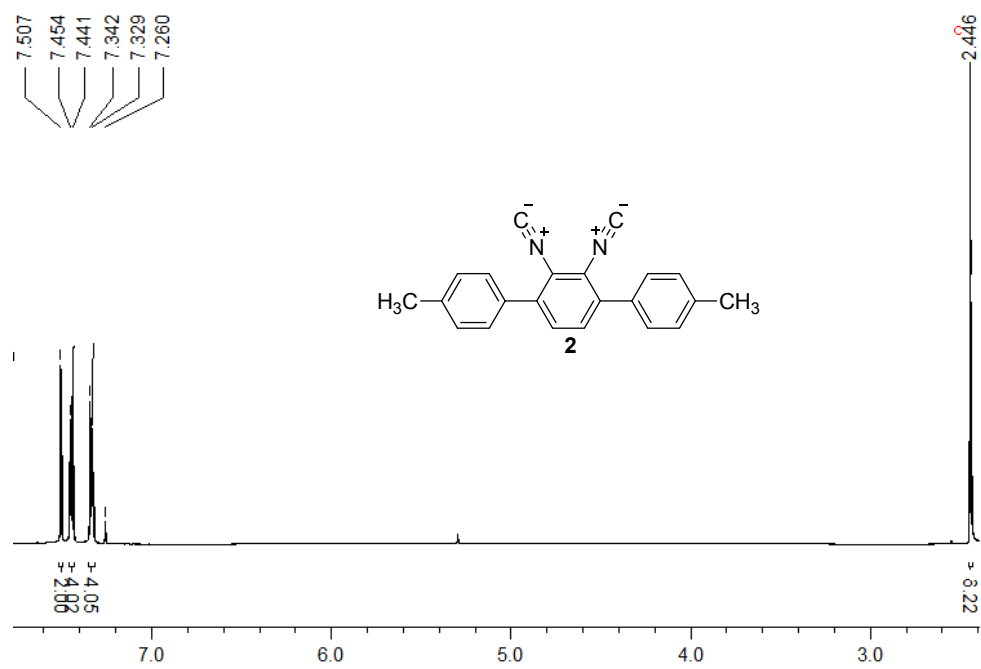

**Fig. S19.** <sup>1</sup>H NMR (600 MHz) spectrum of monomer **2** measured in CDCl<sub>3</sub> at 25 °C.

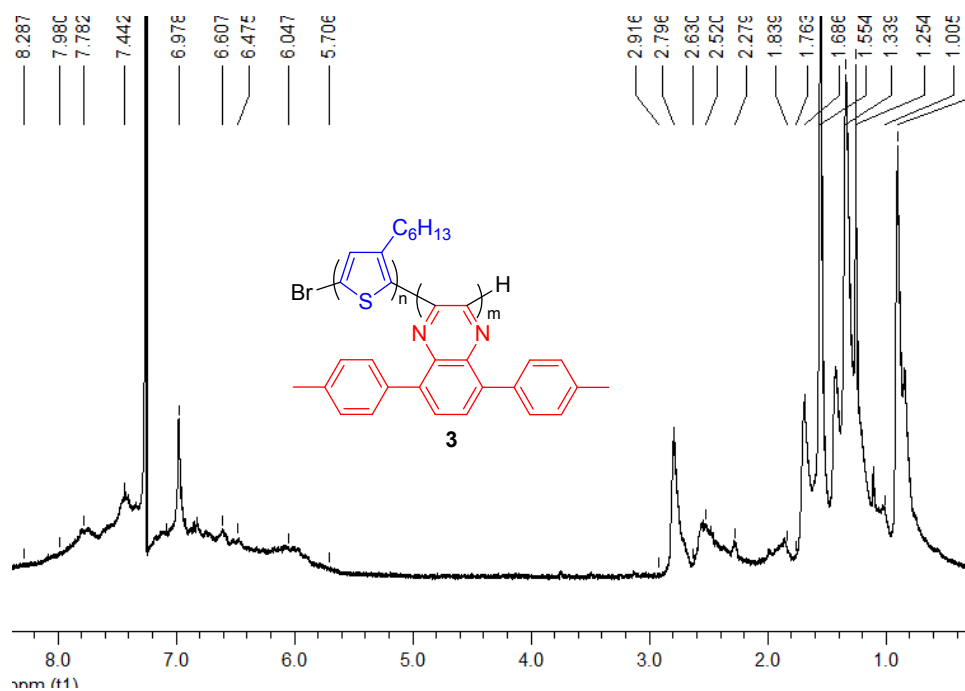

**Fig. S20.**  $^1\text{H}$  NMR (400 MHz) spectrum of P3HT-*b*-PDQ block copolymer (**3a**) measured in  $\text{CDCl}_3$  at 25 °C.

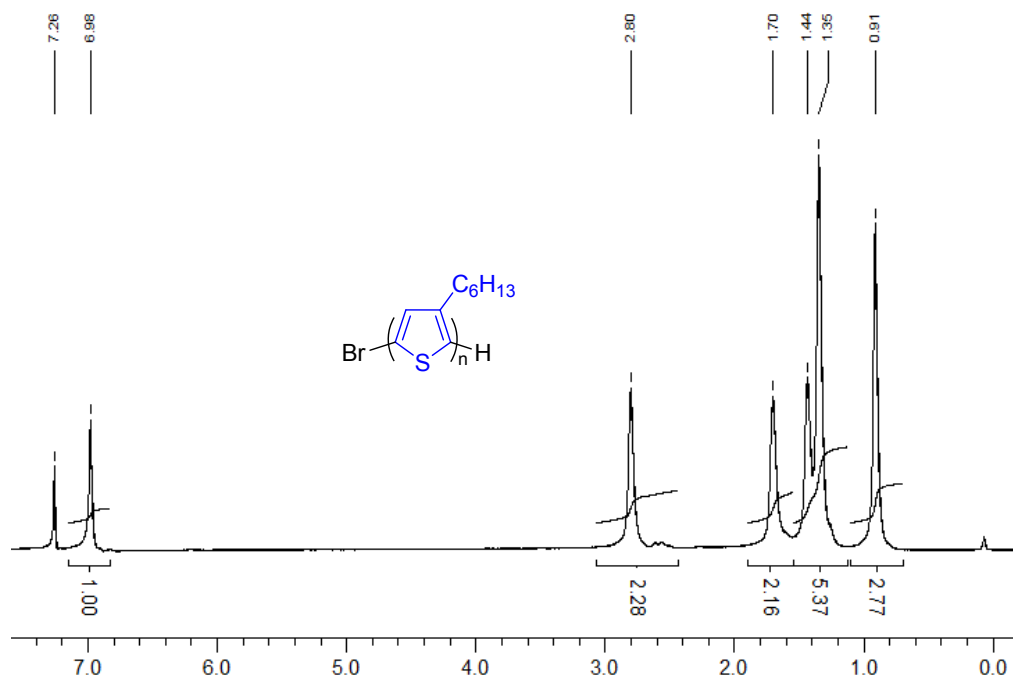

**Fig. S21.** <sup>1</sup>H NMR (600 MHz) spectrum of P3HT (**3a**) measured in CDCl<sub>3</sub> at 25 °C.

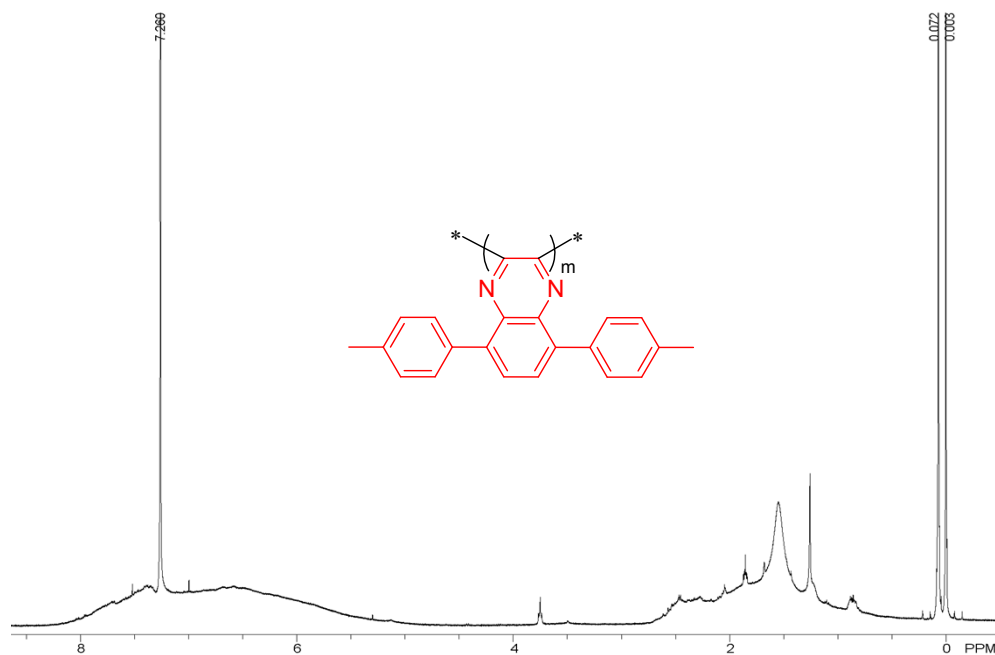

**Fig. S22.**  $^1\text{H}$  NMR (400 MHz) spectrum of homopolymer PDQ measured in  $\text{CDCl}_3$  at 25  $^\circ\text{C}$ .
